# Supplementary material
Source: publisher figshare collection journal article supplement (https://frontiersin.figshare.com/ndownloader/files/30740995)
Supplement: Supplementary file [file 30740995]

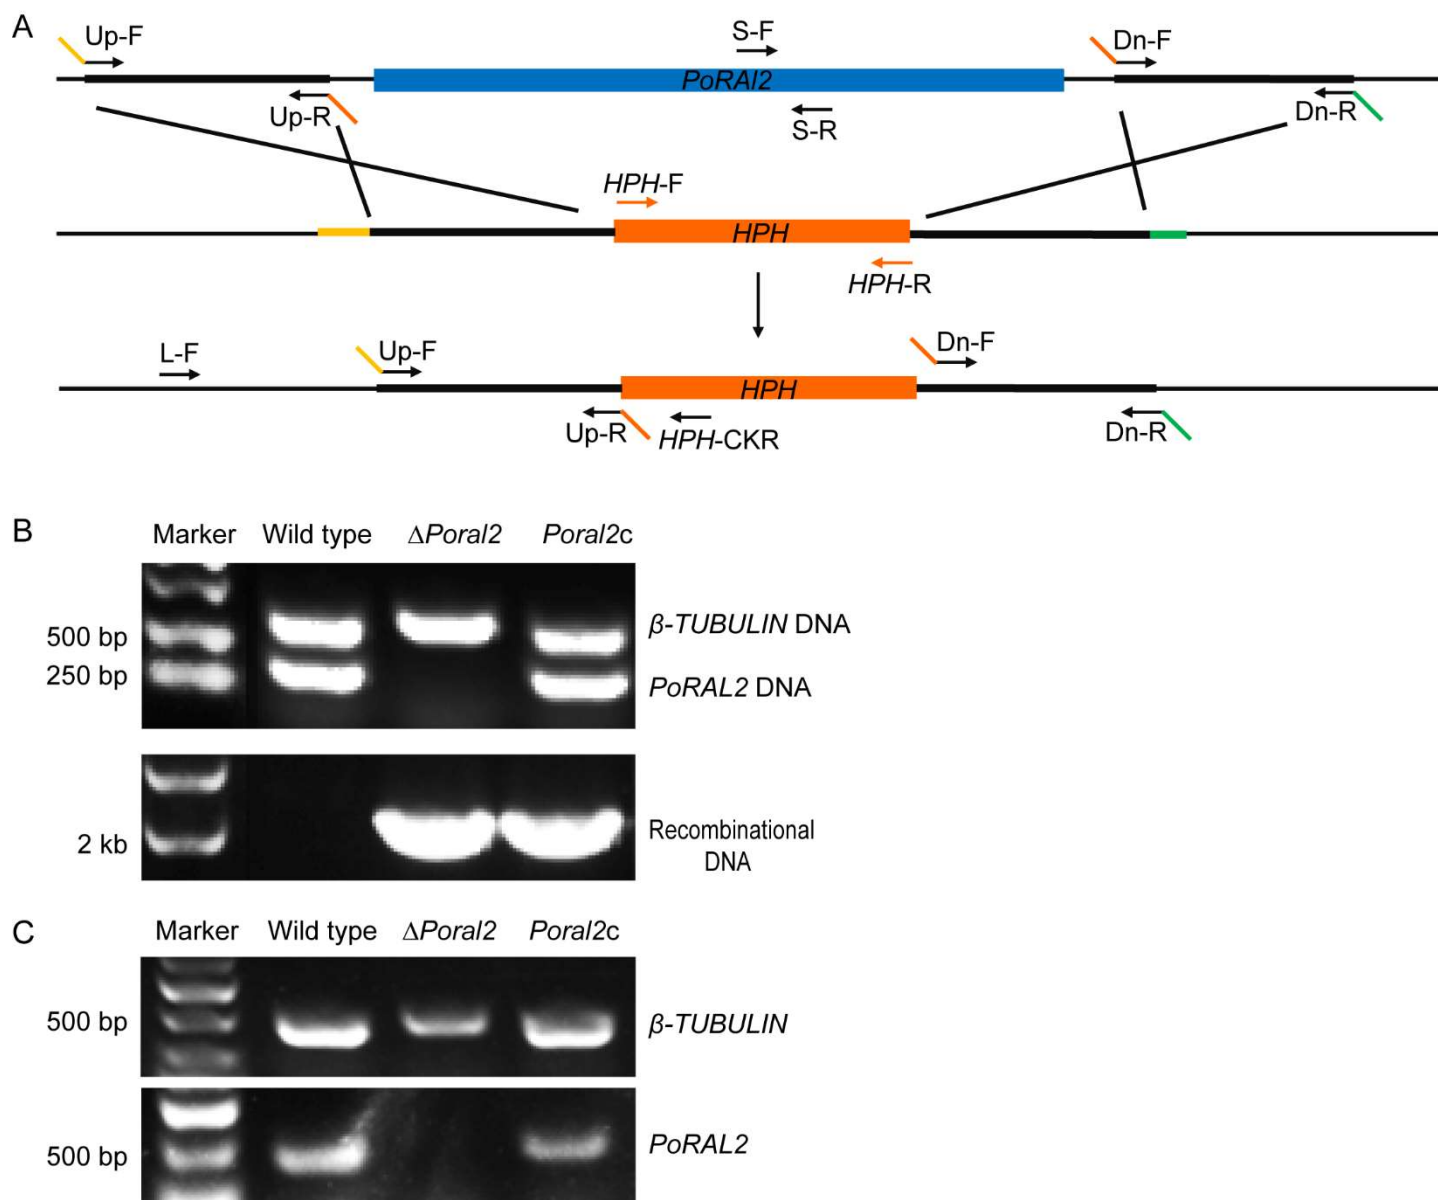

**Supplementary FIGURE S1** Knockout and complementation of *PoRAL2* in *P. oryzae* strain 70-15. **(A)** Knockout strategy. Up-F/Up-R and Dn-F/Dn-R are the two primer sets used to clone two flanking fragments of *PoRAL2*. The L-F/HPH-CKR primer set was used to clone the recombinant DNA fragment in null mutants. The S-F/S-R primer set was used to clone a partial fragment of *PoRAL2* in the wild type and transformants. **(B)** Knockout events were confirmed at the DNA level. The  $\Delta$ *PoRAL2* strain only showed a PCR band of 500 bp (representing  $\beta$ -TUBULIN, used as a positive control), while the wild type also had a band of 307 bp for *PoRAL2* (upper panel).  $\Delta$ *PoRAL2* had a ~2 kb-long recombinant DNA band, while the wild type did not (lower panel). **(C)** Complementation of  $\Delta$ *PoRAL2* by native *PoRAL2*. The mRNA expression level of *PoRAL2* in the complemented strain *PoRAL2c* was confirmed by RT-PCR.  $\beta$ -TUBULIN was used as a control.
